# Supplementary material for: Aplysin Sensitizes Cancer Cells to TRAIL by Suppressing P38 MAPK/Survivin Pathway
Source: Mar Drugs. 2014 Sep 25;12(9):5072–88. doi: 10.3390/md12095072 (PMC4178493; doi:10.3390/md12095072)

## Supplementary Information

**Figure S1.** The expression of survivin, XIAP, cFLIP, FADD, TRAIL-R1 (DR4) and TRAIL-R2 (DR5) was detected in the indicated cancer cells by immunoblot assays.

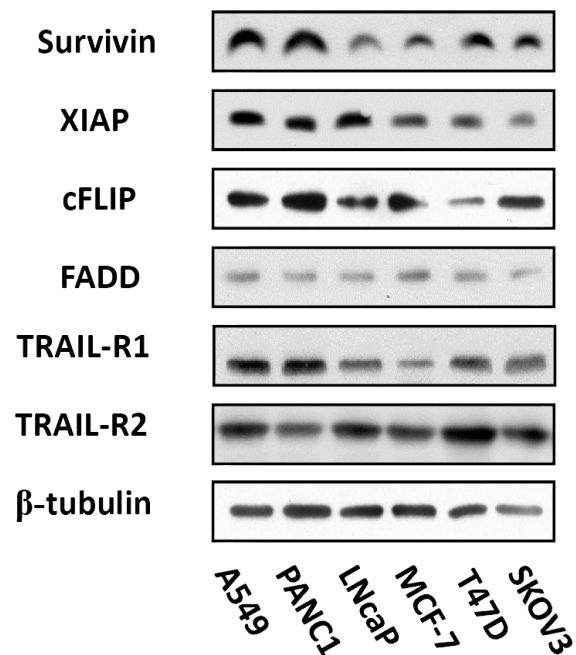

**Figure S2.** The viability of A549 and PANC1 cells were detected 24 h after Z-VAD-FMK (50  $\mu$ M) was used by MTT assays.

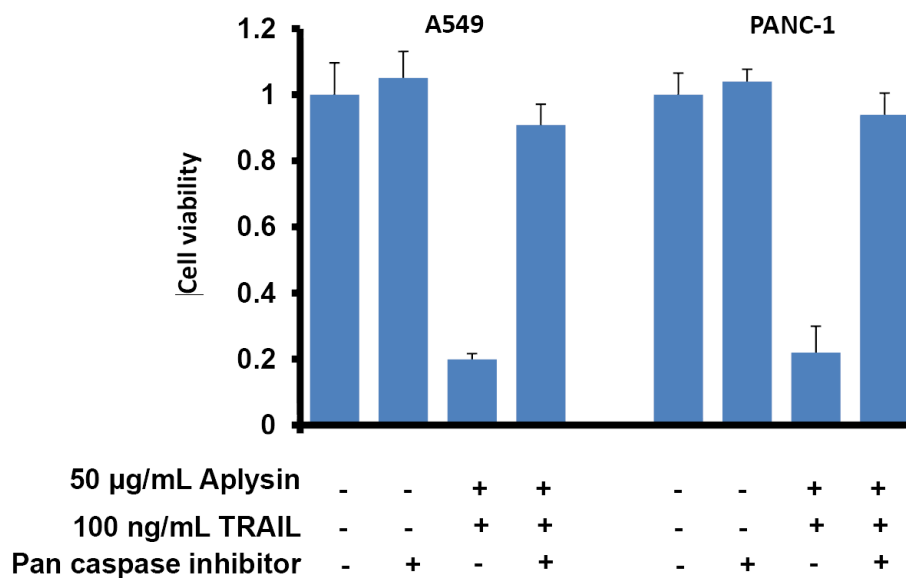

**Figure S3.** The expression of levels of survivin in Figure 5B was quantified using ImageJ software and shown as bars.

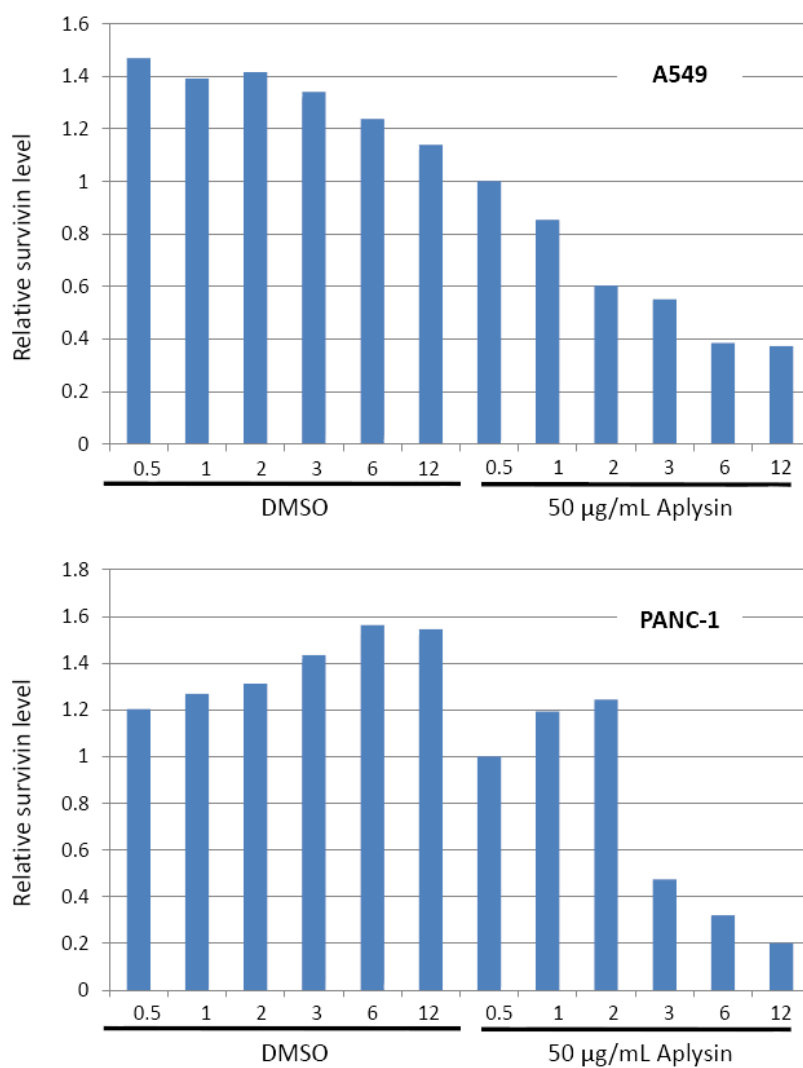

**Figure S4.** The expression of levels of p-p38 MAPK in Figure 7B was quantified using ImageJ software and shown as bars.

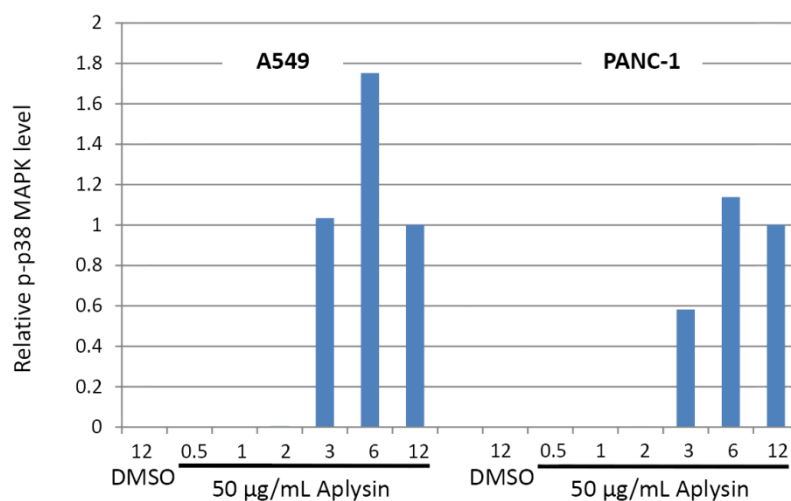

**Figure S5.** The expression of apoptosis inhibitors XIAP and cFLIP, cellular TRAIL receptor TRAIL-R1 and TRAIL-R2, and TRAIL decoy receptor TRAIL-R3 and TRAIL-R4, were detected in A549 and PANC1 cells after 12 h treatment of Aplysin (50  $\mu\text{g/mL}$ ).

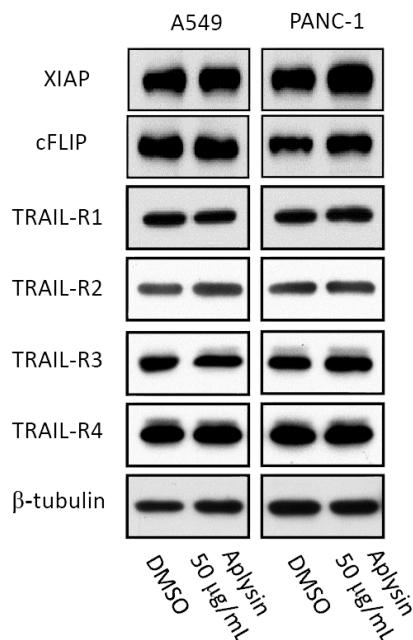

**Figure S6.** The expression levels of the pro-forms of caspase 3, 8 and 9 in Figures 4A (A) and 6C (B) were shown here.

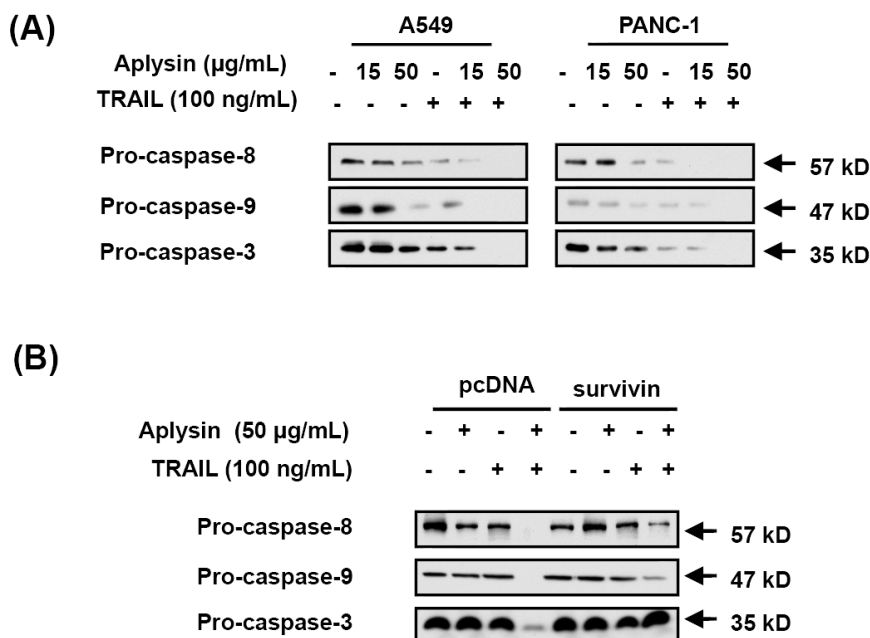

Supplement: Supplementary File 1 [file marinedrugs-12-05072-s001.pdf]
